# Supplementary material for: Fine mapping of the Cepaea nemoralis shell colour and mid-banded loci using a high-density linkage map
Source: Heredity (Edinb). 2023 Sep 27;131(5-6):327–37. doi: 10.1038/s41437-023-00648-z (PMC10673960; doi:10.1038/s41437-023-00648-z)
Supplement: Supplementary file 3 — Table S1 [file 41437_2023_648_MOESM3_ESM.xlsx]

## Sheet: Sheet1
Table S1:	Individuals used in this analysis and their phenotypes. Focal cross parens are in bold.
ID	Parent 1	Parent 2	Shell Ground Colour	Banding
C116	C108*	C109*	Pink	Mid-banded
C120	C108*	C109*	Yellow	Banded
C451	C116	C120	Pink	Mid-banded
C452	C116	C120	Yellow	Banded
C691	C451	C452	Pink	Banded
C692	C451	C452	Pink	Mid-banded
C695	C451	C452	Yellow	Banded
C698	C451	C452	Pink	Mid-banded
C699	C451	C452	Pink	Banded
C700	C451	C452	Pink	Banded
C701	C451	C452	Pink	Banded
C702	C451	C452	Pink	Banded
C703	C451	C452	Pink	Banded
C704	C451	C452	Pink	Banded
C706	C451	C452	Pink	Banded
C707	C451	C452	Yellow	Mid-banded
C708	C451	C452	Yellow	Mid-banded
C709	C451	C452	Yellow	Banded
C714	C451	C452	Yellow	Banded
C715	C451	C452	Pink	Mid-banded
C716	C451	C452	Pink	Mid-banded
C724	C451	C452	Yellow	Banded
C725	C451	C452	Yellow	Banded
C726	C451	C452	Yellow	Mid-banded
C750	C451	C452	Yellow	Mid-banded
C751	C451	C452	Yellow	Banded
C752	C451	C452	Yellow	Banded
C753	C451	C452	Pink	Banded
C754	C451	C452	Pink	Banded
C755	C451	C452	Yellow	Mid-banded
C756	C451	C452	Yellow	Mid-banded
C757	C451	C452	Pink	Mid-banded
C758	C451	C452	Pink	Banded
C769	C451	C452	Yellow	Mid-banded
C770	C451	C452	Pink	Banded
C771	C451	C452	Pink	Mid-banded
C772	C451	C452	Pink	Banded
C773	C451	C452	Pink	Banded
C785	C451	C452	Pink	Mid-banded
C786	C451	C452	Yellow	Banded
C795	C451	C452	Pink	Mid-banded
C796	C451	C452	Pink	Mid-banded
C797	C451	C452	Pink	Mid-banded
C804	C451	C452	Pink	Mid-banded
C805	C451	C452	Yellow	Mid-banded
C806	C451	C452	Pink	Mid-banded
C807	C451	C452	Yellow	Banded
C808	C451	C452	Yellow	Banded
C809	C451	C452	Pink	Mid-banded
C810	C451	C452	Pink	Mid-banded
C811	C451	C452	Pink	Mid-banded
C812	C451	C452	Pink	Mid-banded
C813	C451	C452	Pink	Banded
C814	C451	C452	Pink	Banded
C815	C451	C452	Pink	Banded
C816	C451	C452	Pink	Banded
C825	C451	C452	Pink	Mid-banded
C826	C451	C452	Yellow	Banded
C827	C451	C452	Yellow	Banded
C828	C451	C452	Yellow	Banded
C833	C451	C452	Pink	Mid-banded
C834	C451	C452	Yellow	Mid-banded
C835	C451	C452	Yellow	Banded
C836	C451	C452	Yellow	Banded
C837	C451	C452	Pink	Mid-banded
C838	C451	C452	Pink	Mid-banded
C839	C451	C452	Yellow	Banded
C841	C451	C452	Yellow	Banded
C849	C451	C452	Yellow	Banded
C850	C451	C452	Pink	Banded
C852	C451	C452	Yellow	Banded
C854	C451	C452	Yellow	Banded
C855	C451	C452	Yellow	Mid-banded
C857	C451	C452	Yellow	Mid-banded
C859	C451	C452	Yellow	Banded
C861	C451	C452	Pink	Banded
C883	C451	C452	Yellow	Mid-banded
C887	C451	C452	Yellow	Mid-banded
C888	C451	C452	Yellow	Banded
